# Supplementary material for: Mineral Intake and Cardiovascular Disease, Cancer, and All-Cause Mortality: Findings from the Golestan Cohort Study
Source: MDPI journal article supplement (doi:10.3390/nu16030344), 2024-01-24
Supplement: s1 [file s1]

Table S1. Mean dietary intake of minerals in the Golestan Cohort Study and corresponding Recommended Dietary Allowances (RDA).

| Elements         | Male                     |       | Female                   |       |
|------------------|--------------------------|-------|--------------------------|-------|
|                  | Mean dietary intake (SD) | RDA*  | Mean dietary intake (SD) | RDA*  |
| Zinc (mg/d)      | 10.8±2.8                 | 11    | 9.2±2.5                  | 8     |
| Iron (mg/d)      | 18.5±5.0                 | 8     | 15.7±4.5                 | 8     |
| Calcium (mg/d)   | 765.3±269.2              | 1,000 | 644.8±239.2              | 1,200 |
| Magnesium (mg/d) | 493.4±133.4              | 420   | 414.4±120.5              | 320   |
| Copper (mg/d)    | 1.86±0.5                 | 0.9   | 1.52±0.4                 | 0.9   |
| Selenium (µg/d)  | 164.2±48.9               | 55    | 136.6±44.2               | 55    |

\*RDA: Recommended Dietary Allowances of minerals (for age group 51-70, as the mean of our population was 53 years old) Edited from: National Academies of Sciences, Engineering, and Medicine; Health and Medicine Division; Food and Nutrition Board; Committee to Review the Dietary Reference Intakes for Sodium and Potassium; Oria M, Harrison M, Stallings VA, editors. Dietary Reference Intakes for Sodium and Potassium. Washington (DC): National Academies Press (US); 2019 Mar 5. Appendix J, Dietary Reference Intakes Summary Tables. Available from: <https://www.ncbi.nlm.nih.gov/books/NBK545442/>

Table S2. Correlation coefficients between minerals(n=41,863).

|            | Calcium | Zinc  | Iron   | Magnesium | Phosphorus | Potassium | Copper | Manganese | Selenium |
|------------|---------|-------|--------|-----------|------------|-----------|--------|-----------|----------|
| Calcium    | 1       |       |        |           |            |           |        |           |          |
| Zinc       | 0.315   | 1     |        |           |            |           |        |           |          |
| Iron       | -0.080  | 0.468 | 1      |           |            |           |        |           |          |
| Magnesium  | 0.030   | 0.427 | 0.760  | 1         |            |           |        |           |          |
| Phosphorus | 0.648   | 0.792 | 0.371  | 0.470     | 1          |           |        |           |          |
| Potassium  | 0.254   | 0.157 | -0.096 | 0.177     | 0.199      | 1         |        |           |          |
| Copper     | 0.061   | 0.358 | 0.500  | 0.477     | 0.249      | 0.335     | 1      |           |          |
| Manganese  | -0.206  | 0.119 | 0.512  | 0.801     | 0.079      | 0.274     | 0.357  | 1         |          |
| Selenium   | -0.102  | 0.592 | 0.855  | 0.757     | 0.496      | -0.278    | 0.340  | 0.501     | 1        |

All reported numbers are correlation coefficients. All of the coefficients were statistically significant ( $P < 0.001$ ).

Table S3. HRs (95% CIs) of all-cause mortality for continuous mineral intake.

|                                           | Unadjusted HR          | P-value          | Age and sex adjusted HR | P-value          | Multi-variable adjusted HR | P-value      |
|-------------------------------------------|------------------------|------------------|-------------------------|------------------|----------------------------|--------------|
| Calcium, per 100-mg/1000Kcal/d increase   | <b>0.93(0.91-0.96)</b> | <b>&lt;0.001</b> | <b>0.88(0.86-0.91)</b>  | <b>&lt;0.001</b> | 0.97(0.95-1.00)            | 0.140        |
| Zinc, per 1-mg/1000Kcal/d increase        | <b>1.04(1.00-1.09)</b> | <b>0.032</b>     | 0.99(0.94-1.03)         | 0.642            | 1.02(0.98-1.07)            | 0.201        |
| Iron, per 1-mg/1000Kcal/d increase        | 0.99(0.97-1.01)        | 0.430            | 1.01(0.99-1.03)         | 0.265            | 1.00(0.98-1.02)            | 0.716        |
| Magnesium, per 100-mg/1000Kcal/d increase | <b>1.11(1.03-1.19)</b> | <b>0.006</b>     | <b>1.09(1.02-1.18)</b>  | <b>0.011</b>     | 0.99(0.92-1.07)            | 0.933        |
| Phosphorus, per 50-mg/1000Kcal/d increase | 1.00(0.98-1.01)        | 0.861            | <b>0.96(0.95-0.98)</b>  | <b>&lt;0.001</b> | 0.99(0.98-1.01)            | 0.947        |
| Potassium, per 100-mg/1000Kcal/d increase | <b>1.01(1.00-1.03)</b> | <b>0.002</b>     | 1.00(0.99-1.01)         | 0.442            | 1.00(0.99-1.02)            | 0.163        |
| Copper, per 0.1-mg/1000Kcal/d increase    | 1.01(0.99-1.03)        | 0.056            | <b>1.02(1.01-1.04)</b>  | <b>0.001</b>     | <b>1.01(1.00-1.03)</b>     | <b>0.047</b> |
| Manganese, per 1-mg/1000Kcal/d increase   | <b>1.10(1.07-1.12)</b> | <b>&lt;0.001</b> | <b>1.08(1.06-1.10)</b>  | <b>&lt;0.001</b> | 1.01(0.99-1.04)            | 0.148        |
| Selenium, per 10-μg/1000Kcal/d increase   | <b>1.03(1.01-1.05)</b> | <b>&lt;0.001</b> | <b>1.02(1.01-1.04)</b>  | <b>0.001</b>     | 1.01(0.99-1.03)            | 0.228        |

Data presented as the Hazard Ratio (95%CI). Significant HRs were bolded.

Multivariable models were adjusted for age (year), sex (male or female), place of residence (urban or rural), education (with or without formal education), married status (yes or no), ethnicity (Turkman or others), history of hypertension, BMI, physical activity level (low, intermediate, high), opium use (yes or no), smoking (yes or no), energy (Kcal), wealth score (low, medium, high).

Table S4. HRs (95% CIs) of cardiovascular mortality for continuous mineral intake.

|                                           | Unadjusted HR          | P-value          | Age and sex adjusted HR | P-value          | Multi-variable adjusted HR | P-value      |
|-------------------------------------------|------------------------|------------------|-------------------------|------------------|----------------------------|--------------|
| Calcium, per 100-mg/1000Kcal/d increase   | <b>0.89(0.85-0.94)</b> | <b>&lt;0.001</b> | <b>0.85(0.81-0.89)</b>  | <b>&lt;0.001</b> | <b>0.93(0.88-0.97)</b>     | <b>0.004</b> |
| Zinc, per 1-mg/1000Kcal/d increase        | <b>1.12(1.05-1.20)</b> | <b>&lt;0.001</b> | 1.05(0.98-1.12)         | 0.101            | 1.06(0.98-1.13)            | 0.099        |
| Iron, per 1-mg/1000Kcal/d increase        | <b>1.04(1.00-1.07)</b> | <b>0.018</b>     | <b>1.06(1.02-1.09)</b>  | <b>&lt;0.001</b> | <b>1.03(1.00-1.07)</b>     | <b>0.031</b> |
| Magnesium, per 100-mg/1000Kcal/d increase | <b>1.22(1.08-1.37)</b> | <b>&lt;0.001</b> | <b>1.21(1.08-1.36)</b>  | <b>&lt;0.001</b> | 1.05(0.93-1.19)            | 0.372        |
| Phosphorus, per 50-mg/1000Kcal/d increase | 1.01(0.98-1.03)        | 0.378            | 0.97(0.95-1.00)         | 0.053            | 0.99(0.97-1.02)            | 0.766        |
| Potassium, per 100-mg/1000Kcal/d increase | 1.01(0.99-1.03)        | 0.159            | 0.99(0.97-1.01)         | 0.710            | 0.99(0.97-1.01)            | 0.760        |
| Copper, per 0.1-mg/1000Kcal/d increase    | <b>1.03(1.00-1.06)</b> | <b>0.014</b>     | <b>1.04(1.02-1.07)</b>  | <b>&lt;0.001</b> | <b>1.03(1.00-1.06)</b>     | <b>0.027</b> |
| Manganese, per 1-mg/1000Kcal/d increase   | <b>1.11(1.07-1.14)</b> | <b>&lt;0.001</b> | <b>1.09(1.06-1.13)</b>  | <b>&lt;0.001</b> | 1.02(0.99-1.06)            | 0.141        |
| Selenium, per 10-μg/1000Kcal/d increase   | <b>1.07(1.04-1.10)</b> | <b>&lt;0.001</b> | <b>1.06(1.04-1.09)</b>  | <b>&lt;0.001</b> | <b>1.04(1.01-1.07)</b>     | <b>0.008</b> |

Data presented as the Hazard Ratio (95%CI). Significant HRs were bolded.

Multivariable models were adjusted for age (year), sex (male or female), place of residence (urban or rural), education (with or without formal education), married status (yes or no), ethnicity (Turkman or others), history of hypertension, BMI, physical activity level (low, intermediate, high), opium use (yes or no), smoking (yes or no), energy (Kcal), wealth score (low, medium, high).

Table S5. HRs (95% CIs) of cancer mortality for continuous mineral intake.

|                                           | Unadjusted HR          | P-value          | Age and sex adjusted HR | P-value          | Multi-variable adjusted HR | P-value |
|-------------------------------------------|------------------------|------------------|-------------------------|------------------|----------------------------|---------|
| Calcium, per 100-mg/1000Kcal/d increase   | 0.95(0.89-1.00)        | 0.094            | <b>0.90(0.85-0.95)</b>  | <b>0.001</b>     | 0.98(0.92-1.04)            | 0.527   |
| Zinc, per 1-mg/1000Kcal/d increase        | <b>0.91(0.82-0.99)</b> | <b>0.045</b>     | <b>0.87(0.79-0.95)</b>  | <b>0.003</b>     | 0.92(0.84-1.01)            | 0.100   |
| Iron, per 1-mg/1000Kcal/d increase        | <b>0.94(0.90-0.98)</b> | <b>0.011</b>     | <b>0.95(0.91-0.99)</b>  | <b>0.039</b>     | 0.96(0.91-1.00)            | 0.097   |
| Magnesium, per 100-mg/1000Kcal/d increase | 0.96(0.82-1.13)        | 0.687            | 0.93(0.80-1.09)         | 0.404            | 0.90(0.76-1.06)            | 0.222   |
| Phosphorus, per 50-mg/1000Kcal/d increase | 0.96(0.93-1.00)        | 0.052            | <b>0.94(0.91-0.97)</b>  | <b>&lt;0.001</b> | 0.97(0.93-1.00)            | 0.089   |
| Potassium, per 100-mg/1000Kcal/d increase | 1.00(0.98-1.03)        | 0.600            | 0.99(0.97-1.02)         | 0.970            | 1.01(0.98-1.04)            | 0.329   |
| Copper, per 0.1-mg/1000Kcal/d increase    | 0.97(0.93-1.01)        | 0.253            | 0.97(0.93-1.01)         | 0.210            | 0.97(0.93-1.02)            | 0.294   |
| Manganese, per 1-mg/1000Kcal/d increase   | <b>1.07(1.02-1.13)</b> | <b>&lt;0.001</b> | <b>1.05(1.01-1.10)</b>  | <b>&lt;0.015</b> | 1.01(0.96-1.07)            | 0.460   |
| Selenium, per 10-μg/1000Kcal/d increase   | 0.99(0.95-1.02)        | 0.611            | 0.97(0.94-1.01)         | 0.245            | 0.96(0.93-1.00)            | 0.114   |

Data presented as the Hazard Ratio (95%CI). Significant HRs were bolded.

Multivariable models were adjusted for age (year), sex (male or female), place of residence (urban or rural), education (with or without formal education), married status (yes or no), ethnicity (Turkman or others), BMI, physical activity level (low, intermediate, high), opium use (yes or no), smoking (yes or no), energy (Kcal), wealth score (low, medium, high).
