# Supplementary figures and images for: Mineral Intake and Cardiovascular Disease, Cancer, and All-Cause Mortality: Findings from the Golestan Cohort Study
Source: MDPI journal article supplement (doi:10.3390/nu16030344), 2024-01-24

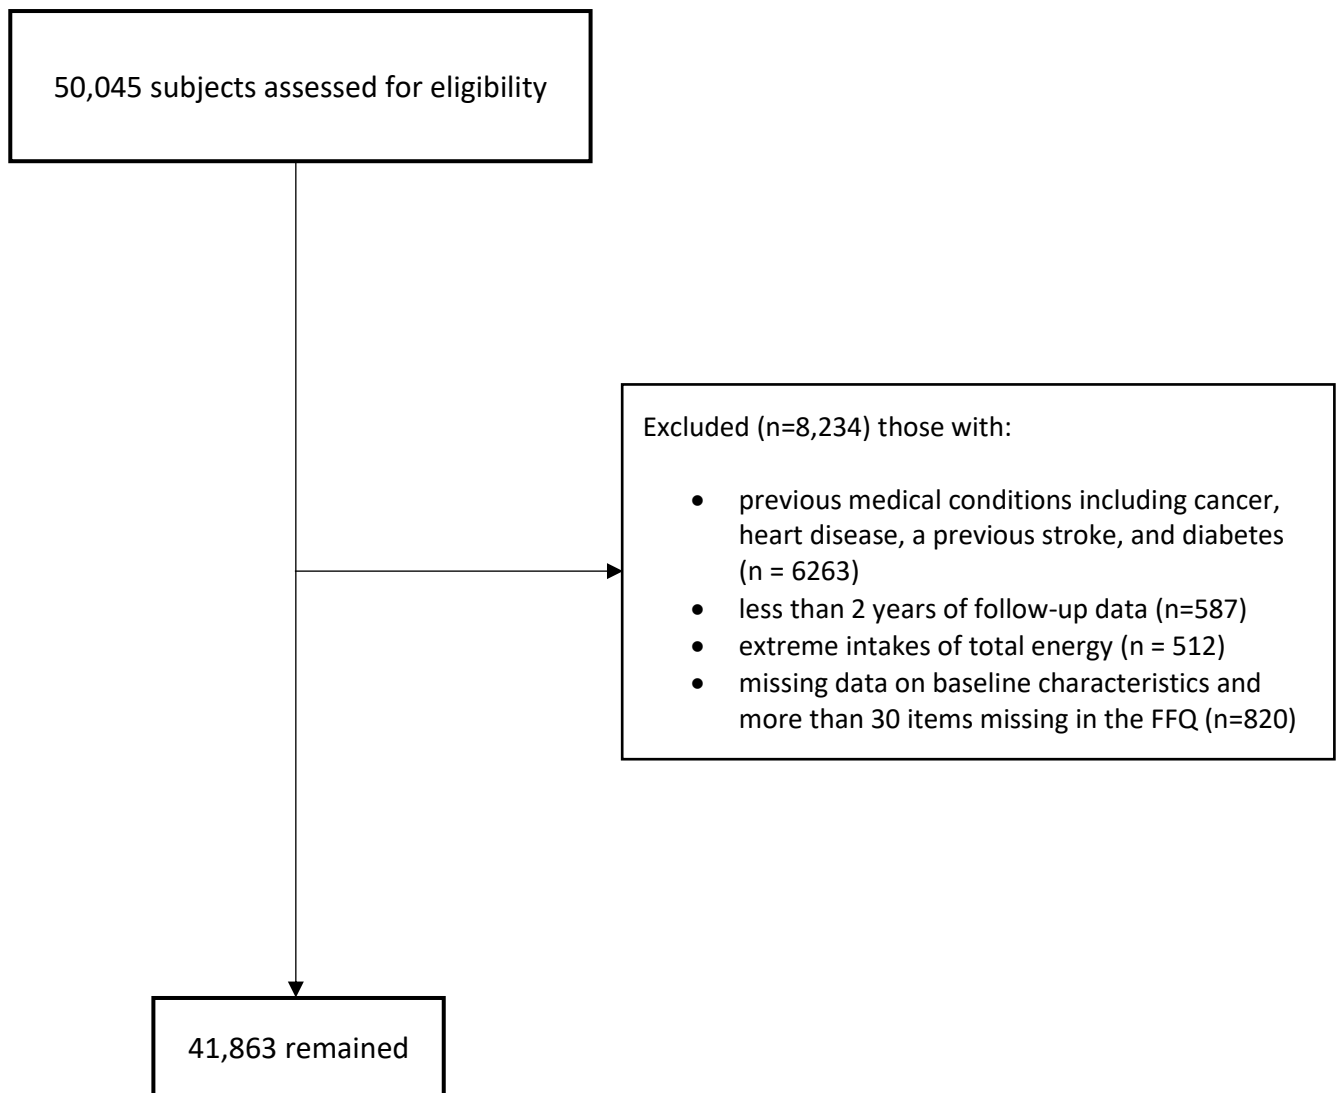

Figure S1. Participants flow chart

Supplement: s1 [file s1]
